# Supplementary material for: The Relationship between Epigenetic Age and Myocardial Infarction/Acute Coronary Syndrome in a Population-Based Nested Case-Control Study
Source: MDPI journal article supplement (doi:10.3390/jpm12010110), 2022-01-14
Supplement: s1 [file s1]

**Table S1.** Relationship between MI/ACS and epigenetic age acceleration, per 1 year increment of the difference between baseline EA minus CA in men and women (men  $n=171$ , women,  $n=135$ ).

| Measure of epigenetic age       | n, case/control    | Model1               | Model2                | Model3               |
|---------------------------------|--------------------|----------------------|-----------------------|----------------------|
|                                 |                    | OR (95%CI)           | OR (95%CI)            | OR (95%CI)           |
| Men                             |                    |                      |                       |                      |
| $\Delta\text{AHR}$ , per 1 year | 67/104             | 1.000<br>(0.93-1.08) | 1.006<br>(0.93-1.08)  | 1.000<br>(0.92-1.08) |
|                                 | p-value for trends | 0.994                | 0.880                 | 0.993                |
| $\Delta\text{AHn}$ , per 1 year | 67/104             | 0.995<br>(0.92-1.08) | 1.000<br>(0.92-1.09)  | 1.000<br>(0.91-1.09) |
|                                 | p-value for trends | 0.903                | 0.992                 | 0.991                |
| $\Delta\text{APh}$ , per 1 year | 67/104             | 1.035<br>(0.98-1.09) | 1.026<br>(0.971-1.09) | 1.026<br>(0.96-1.09) |
|                                 | p-value for trends | 0.239                | 0.401                 | 0.426                |
| $\Delta\text{ASB}$ , per 1 year | 67/104             | 0.986<br>(0.89-1.09) | 0.989<br>(0.89-1.09)  | 0.988<br>(0.89-1.10) |
|                                 | p-value for trends | 0.782                | 0.831                 | 0.825                |
| Women                           |                    |                      |                       |                      |
| $\Delta\text{AHR}$ , per 1 year | 62/73              | 1.008<br>(0.93-1.09) | 1.013<br>(0.93-1.10)  | 1.037<br>(0.95-1.14) |
|                                 | p-value for trends | 0.994                | 0.763                 | 0.435                |
| $\Delta\text{AHn}$ , per 1 year | 62/73              | 1.009<br>(0.93-1.10) | 1.016<br>(0.94-1.10)  | 1.033<br>(0.94-1.13) |
|                                 | p-value for trends | 0.824                | 0.708                 | 0.492                |
| $\Delta\text{APh}$ , per 1 year | 62/73              | 1.008<br>(0.95-1.07) | 1.004<br>(0.95-1.06)  | 1.008<br>(0.94-1.8   |
|                                 | p-value for trends | 0.788                | 0.904                 | 0.806                |
| $\Delta\text{ASB}$ , per 1 year | 62/73              | 0.999<br>(0.91-1.10) | 1.005<br>(0.91-1.8)   | 1.031<br>(0.92-1.15) |
|                                 | p-value for trends | 0.980                | 0.926                 | 0.592                |

$\Delta\text{AHR}$  – difference between EA by Horvath and chronological age;  $\Delta\text{AHn}$  – difference between EA by Hannum and chronological age;  $\Delta\text{APh}$  – difference between Phenotypic EA and chronological age;  $\Delta\text{ASB}$  – difference between Skin and Blood EA and chronological age; OR – odds ratio ratio; CI – confidence interval; Model 1: age-adjusted; Model 2: adjusted for age and sex; Model 2:– adjusted for age, and smoking; model 3: adjusted for age, smoking, SBP, TC, BMI and education.

**Table S2.** Distribution of baseline covariates among cases of incident MI/ACS and expanded control(cases, n = 129 and controls, n =265).

| Covariates                                        | Cases (incident MI/ACS) | Expanded controls | p-value |
|---------------------------------------------------|-------------------------|-------------------|---------|
| Observed                                          | 129                     | 265               |         |
| Age at baseline, years (mean, SD)                 | 59.8 (6.87)             | 57.4 (6.95)       | <0.001  |
| Females (%)                                       | 62 (48.1)               | 155 (58.5)        | 0.051   |
| Systolic blood pressure, mmHg (mean, SD)          | 151.6 (26.93)           | 136.7 (23.10)     | <0.001  |
| Diastolic blood pressure, mmHg (mean, SD)         | 92.3 (14.36)            | 86.5 (12.55)      | <0.001  |
| Body mass index, kg/sqm (mean, SD)                | 28.8 (5.73)             | 27.83 (4.83)      | 0.073   |
| Waist/hip ratio, unit (mean, SD)                  | 0.90 (0.077)            | 0.88 (0.032)      | 0.006   |
| Total cholesterol mmol/l (mean, SD)               | 6.61 (1.27)             | 6.44 (1.26)       | 0.210   |
| LDL cholesterol, mmol/l (mean, SD)                | 4.32 (1.14)             | 4.19 (1.12)       | 0.287   |
| Glucose, plasma, mmol/l mean, SD)                 | 6.41 (2.29)             | 5.82 (0.92)       | <0.001  |
| Hypertension (%)                                  | 96(74.4)                | 136 (51.3)        | <0.001  |
| HT treatment (among HT), (%)                      | 46 (47.9)               | 55 (40.4)         | 0.001   |
| Diabetes mellitus type 2 (%)                      | 24(18.9)                | 16 (6.3)          | <0.001  |
| DM2 treatment (among DM2), (%)                    | 8 (33.3)                | 5.(31.3)          | 0.840   |
| Frequency of drinking (%)                         |                         |                   |         |
| Non-drinkers                                      | 24 (18.6)               | 28 (10.6)         |         |
| < 1/month                                         | 55 (42.6)               | 116 (43.8)        | 0.125   |
| 1-3/month                                         | 25 (19.4)               | 50 (18.9)         |         |
| 1-4/week                                          | 22 (17.1)               | 67 (25.3)         |         |
| 5+/week                                           | 3 (2.3)                 | 4 (1.5)           |         |
| Smoking (%)                                       |                         |                   |         |
| Never smoking                                     | 75 (58.1)               | 163 (61.5)        | 0.006   |
| Former smoking                                    | 10 (7.8)                | 44 (16.6)         |         |
| Present smoker                                    | 27 (20.9)               | 58 (21.9)         |         |
| Married (%)                                       | 96 (74.4)               | 192 (72.5)        | 0.680   |
| University education (%)                          | 27 (20.9)               | 89 (33.6)         | <0.001  |
| Difference EA-chronological age by four measures: |                         |                   |         |
| $\Delta$ AHr, year                                | 0.055 (5.35)            | 1.213 (4.92)      | 0.034   |
| $\Delta$ AHn, year                                | -2.702 (5.36)           | -1.831 (4.64)     | 0.098   |
| $\Delta$ APh, year                                | -8.945 (6.43)           | -8.977 (6.01)     | 0.960   |
| $\Delta$ ASB, year                                | -2.551 (4.06)           | -1.551 (3.50)     | 0.012   |

SD – standard deviation; EA- epigenetic age; CVD – cardiovascular disease

<sup>a</sup> ANOVA or Chi-square test.

**Table S3.** Relationship between MI/ACS and epigenetic age acceleration, per 1 year increment of the difference between baseline EA minus CA in the expanded sample (cases, n = 129 and controls, n =265).

| Measure of<br>epigenetic<br>age | n, case/<br>control | Model1      | Model2      | Model3       | Model4      |
|---------------------------------|---------------------|-------------|-------------|--------------|-------------|
|                                 |                     | OR (95%CI)  | OR (95%CI)  | OR (95%CI)   | OR (95%CI)  |
| $\Delta$ AHr,<br>per 1 year     | 129/177             | 0.98        | 0.969       | 0.971        | 0.971       |
|                                 |                     | (0.94-1.03) | (0.92-1.06) | (0.93-1.02)  | (0.92-1.02) |
|                                 | p-value for trends  | 0.391       | 0.193       | 0.230        | 0.258       |
| $\Delta$ AHn,<br>per 1 year     | 129/177             | 0.996       | 0.979       | 0.984        | 0.995       |
|                                 |                     | (0.95-1.05) | (0.93-1.03) | (0.93-1.04)  | (0.94-1.05) |
|                                 | p-value for trends  | 0.886       | 0.413       | 0.554        | 0.860       |
| $\Delta$ APh,<br>per 1 year     | 129/177             | 1.014       | 1.005       | 1.000        | 0.998       |
|                                 |                     | (0.98-1.05) | (0.97-1.04) | (0.961-1.04) | (0.96-1.04) |
|                                 | p-value for trends  | 0.439       | 0.809       | 0.988        | 0.923       |
| $\Delta$ ASB,<br>per 1 year     | 129/177             | 0.950       | 0.938       | 0.947        | 0.949       |
|                                 |                     | (0.89-1.01) | (0.88-1.00) | (0.89-1.1    | (0.88-1.02) |
|                                 | p-value for trends  | 0.096       | 0.055       | 0.088        | 0.135       |

$\Delta$ AHr – difference between EA by Horvath and chronological age;  $\Delta$ AHn – difference between EA by Hannum and chronological age;  $\Delta$ APh – difference between Phenotypic EA and chronological age;  $\Delta$ ASB – difference between Skin and Blood EA and chronological age; OR – odds ratio; CI – confidence interval;

Model 1: age-adjusted; Model 2: adjusted for age and sex; Model 3: adjusted for age, sex and smoking; Model 4: adjusted for age, sex, smoking, SBP, TC, BMI and education.

**Table S4.** Relationship between MI/ACS and epigenetic age acceleration in the expanded sample, by tertiles of the difference between baseline EA minus CA (cases, n=129 and controls, n=265).

| Measure of epigenetic age | n, case/control | Tertiles          | Absolute difference<br>T1-T2<br>T2-T3 | Model1           | Model2           | Model3           | Model4           |
|---------------------------|-----------------|-------------------|---------------------------------------|------------------|------------------|------------------|------------------|
|                           |                 |                   |                                       | OR (95%CI)       | OR (95%CI)       | OR (95%CI)       | OR (95%CI)       |
|                           |                 |                   |                                       |                  |                  |                  |                  |
| $\Delta\text{AHR}$ , year | 129/265         | T1 (ref)          |                                       | 1.0              | 1.0              | 1.0              | 1.0              |
|                           |                 | T2                | 5.31                                  | 0.68 (0.40-1.15) | 0.64 (0.38-1.09) | 0.61 (0.36-1.05) | 0.66 (0.38-1.18) |
|                           |                 | T3                | 5.48                                  | 0.86 (0.50-1.49) | 0.79 (0.45-1.38) | 0.80 (0.45-1.42) | 0.83 (0.45-1.51) |
|                           |                 | p-value for trend |                                       | 0.540            | 0.366            | 0.395            | 0.489            |
|                           |                 |                   |                                       |                  |                  |                  |                  |
| $\Delta\text{AHn}$ , year | 129/265         | T1 (ref)          |                                       | 1.0              | 1.0              | 1.0              | 1.0              |
|                           |                 | T2                | 4.94                                  | 0.86 (0.50-1.46) | 0.79 (0.46-1.36) | 0.88 (0.51-1.53) | 0.94 (0.52-1.69) |
|                           |                 | TQ3               | 5.31                                  | 1.17 (0.65-2.09) | 0.97 (0.53-1.78) | 1.06 (0.57-1.96) | 1.24 (0.64-2.40) |
|                           |                 | p-value for trend |                                       | 0.626            | 0.894            | 0.888            | 0.550            |
|                           |                 |                   |                                       |                  |                  |                  |                  |
| $\Delta\text{APh}$ , year | 129/265         | T1 (ref)          |                                       | 1.0              | 1.0              | 1.0              | 1.0              |
|                           |                 | T2                | 6.34                                  | 0.97 (0.57-1.65) | 0.96 (0.56-1.63) | 0.98 (0.57-1.68) | 0.95 (0.53-1.68) |
|                           |                 | T3                | 7.03                                  | 1.42 (0.85-2.42) | 1.26 (0.73-2.18) | 1.24 (0.70-2.17) | 1.10 (0.61-2.00) |
|                           |                 | p-value for trend |                                       | 0.197            | 0.415            | 0.472            | 0.768            |
|                           |                 |                   |                                       |                  |                  |                  |                  |
| $\Delta\text{ASB}$ , year | 129/265         | T1 (ref)          |                                       | 1.0              | 1.0              | 1.0              | 1.0              |
|                           |                 | T2                | 3.79                                  | 0.54 (0.32-0.93) | 0.51 (0.30-0.88) | 0.52 (0.29-0.89) | 0.56 (0.32-1.00) |
|                           |                 | T3                | 4.05                                  | 0.82 (0.48-1.38) | 0.73 (0.42-1.25) | 0.78 (0.45-1.35) | 0.80 (0.44-1.44) |
|                           |                 | p-value for trend |                                       | 0.432            | 0.241            | 0.363            | 0.424            |
|                           |                 |                   |                                       |                  |                  |                  |                  |

$\Delta\text{AHR}$  – difference between EA by Horvath and chronological age;  $\Delta\text{AHn}$  – difference between EA by Hannum and chronological age;  $\Delta\text{APh}$  – difference between Phenotypic EA and chronological age;  $\Delta\text{ASB}$  – difference between Skin and Blood EA and chronological age; OR – odds ratio; CI – confidence interval;

Model 1: age-adjusted; Model 2: adjusted for age and sex; Model 3: adjusted for age, sex and smoking; Model 4: adjusted for age, sex, smoking, SBP, TC, BMI and education.
